# Supplementary material for: Aramid Nanofibers/Reduced Graphene Oxide Composite Electrodes with High Mechanical Properties
Source: MDPI journal article supplement (doi:10.3390/nano13010103), 2022-12-25
Supplement: s1 [file s1]

# Supporting Information

## Aramid Nanofibers/Reduced Graphene Oxide Composite Electrodes with High Mechanical Properties

Jingyi Wang <sup>1,2</sup>, Shaojie Lu <sup>2</sup>, Mingyu Ye <sup>2</sup>, Xiaowan Zhan <sup>2</sup>, Hongbing Jia <sup>2\*</sup>, Xin Liao <sup>2\*</sup>, Antonio F. A. A. Melo <sup>2,3,4</sup>

- <sup>1</sup> School of New Materials and Shoes & Clothing Engineering, Liming Vocational University, Quanzhou, 362000, China
- <sup>2</sup> Key Laboratory for Soft Chemistry and Functional Materials of Ministry of Education, Nanjing University of Science and Technology, Nanjing 210094, China
- <sup>3</sup> São Carlos Institute of Physics, University of São Paulo, São Carlos, São Paulo, Brazil
- <sup>4</sup> Materials Engineering Graduate Program, Federal Institute of Education, Science and Technology of Piauí, Teresina, Brazil
- \* Correspondence: polymernjust@gmail.com (H.J. ); liaoxin331@163.com (X.L.)

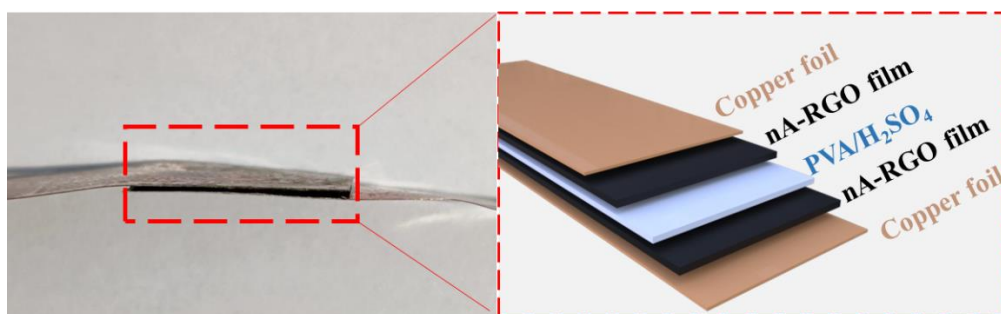

**Figure S1.** Schematic structure and digital images of the nA-RGO solid-state supercapacitor device

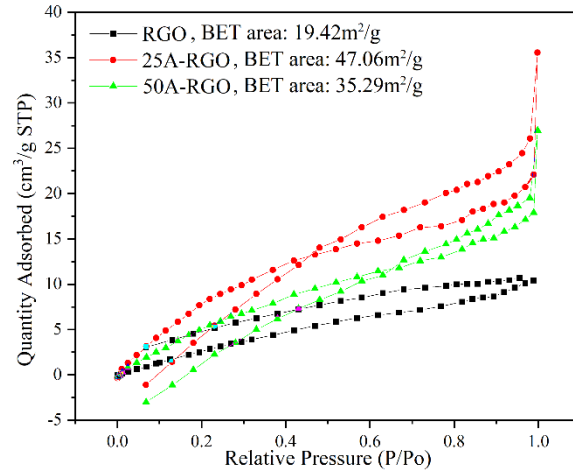

**Figure S2.** Adsorption-desorption isotherm curves of RGO, 25A-RGO and 50A-RGO

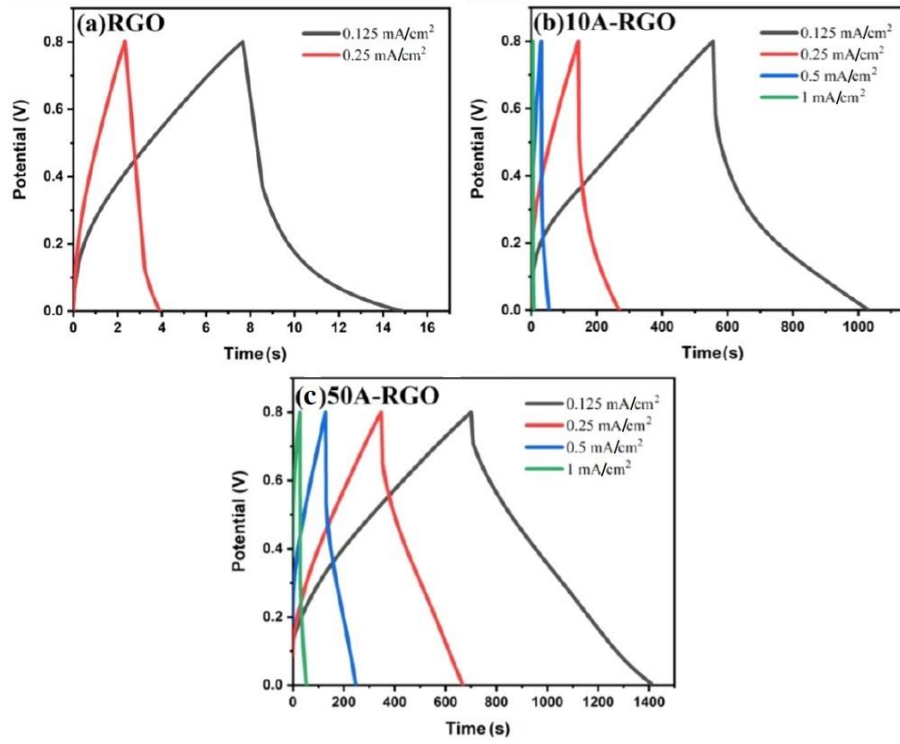

**Figure S3.** GCD curves at different scan rates of (a) RGO, (b) 10A-RGO and (c) 50A-RGO film electrodes

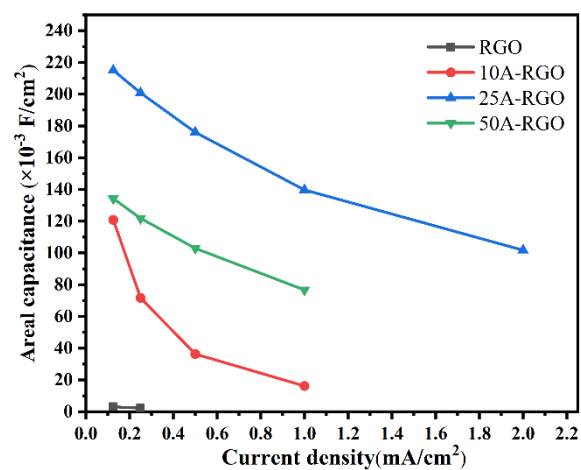

**Figure S4.** Areal capacitance of RGO and nA-RGO film electrodes at different current densities

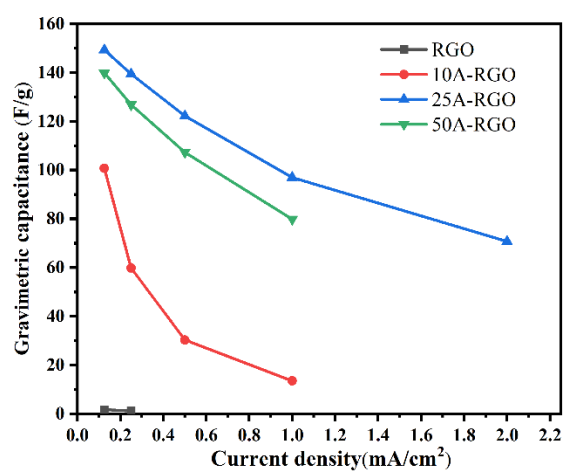

**Figure S5.** Gravimetric capacitance of RGO and nA-RGO film electrodes at different current densities

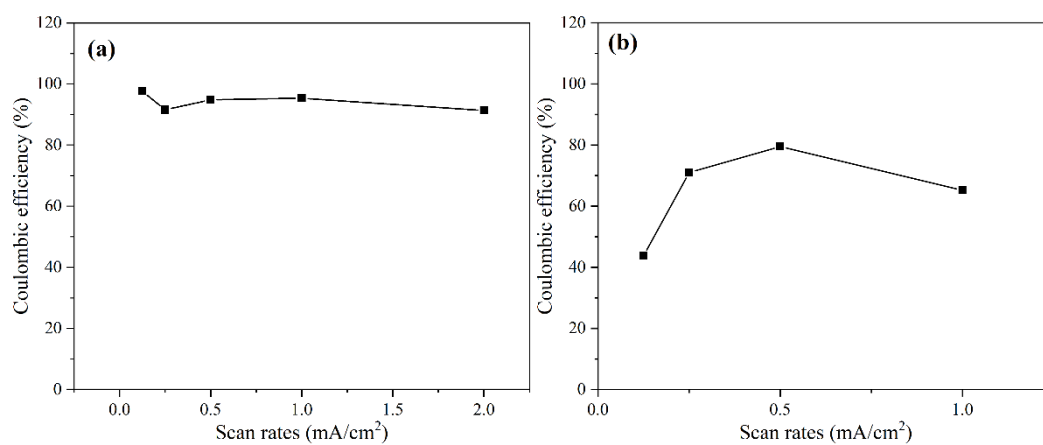

**Figure S6.** Coulombic efficiency of (a) 25A-RGO film electrode and (b) supercapacitor based on 25A-RGO composite film
